# Supplementary material
Source: MDPI journal article supplement (https://www.mdpi.com/1424-2818/9/1/18)
Supplement: s1 [file s1]

# Age and Growth of An Outbreking *Acanthaster* cf. *solaris* Population within the Great Barrier Reef

M. Aaron MacNeil <sup>1,2,3,\*</sup>, Karen M. Chong-Seng <sup>2</sup>, Deborah J. Pratchett <sup>2</sup>, Casssandra A. Thompson <sup>2</sup>, Vanessa Messmer <sup>2</sup> and Morgan S. Pratchett <sup>2</sup>

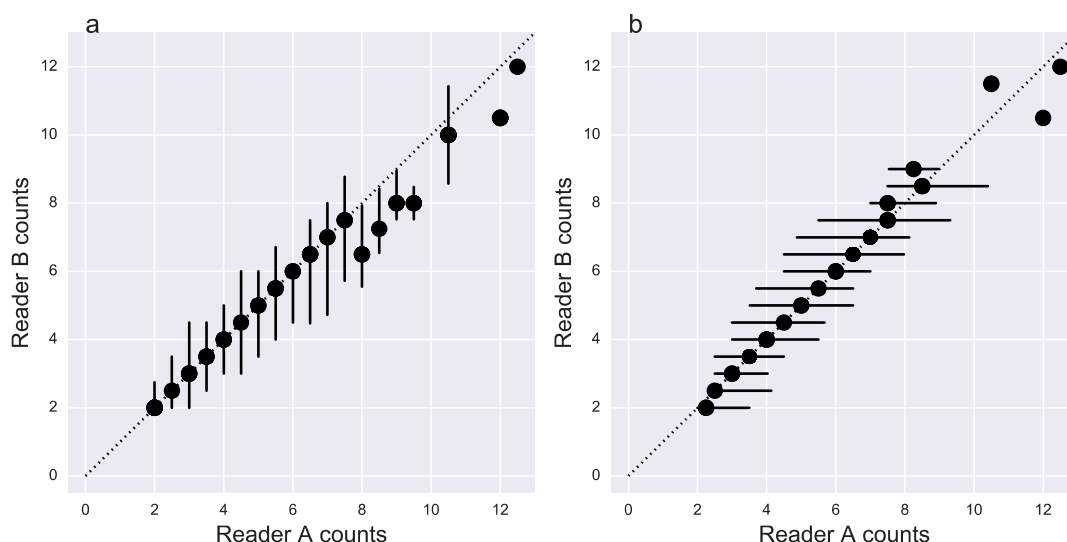

**Figure S1.** Inter-reader comparability for dry counts of crown-of-thorns starfish (*Acanthaster* cf. *planci*) spines collected from the Great Barrier Reef CoTS initiation box, 2013–2014. **(a)** mean (black dot) and 95% quantiles (black line) for Reader D relative to Reader K; **(b)** mean and 95% quantiles for Reader K relative to Reader D.

**Table S1.** Posterior parameter estimates for a Bayesian von Bertalanffy 3-parameter model fit to the data presented in Figure 5 of [5]. Estimates presented are the posterior median and 95% uncertainty intervals (95% highest posterior density). Model structure was as in (1), using weakly (un)-informative priors and without a reef-level structure or quality scoring.

| Parameter    | Median | 95% UI         |
|--------------|--------|----------------|
| $L_{\infty}$ | 565.1  | [518.0, 617.3] |
| $k$          | 0.21   | [0.17, 0.24]   |
| $L_0$        | 0.03   | [0.00, 4.35]   |

**Table S2.** Reef-specific posterior parameter estimates for a Bayesian von Bertalanffy 3-parameter model fit to data from the GBR between October 2013 and November 2014. Estimates presented are the posterior median and 95% uncertainty intervals (95% highest posterior density).

| Reef          | Parameter    | Median | 95% UI       |
|---------------|--------------|--------|--------------|
| <i>Trunk</i>  |              |        |              |
|               | $L_{\infty}$ | 332    | [304, 356]   |
|               | $k$          | 0.54   | [0.45, 0.69] |
| <i>Rib</i>    |              |        |              |
|               | $L_{\infty}$ | 314    | [276, 358]   |
|               | $k$          | 0.50   | [0.35, 0.69] |
| <i>Davies</i> |              |        |              |
|               | $L_{\infty}$ | 391    | [350, 431]   |
|               | $k$          | 0.57   | [0.34, 0.76] |

|                        |              |      |              |
|------------------------|--------------|------|--------------|
| <i>Centipede</i>       |              |      |              |
|                        | $L_{\infty}$ | 413  | [358, 488]   |
|                        | $k$          | 0.49 | [0.31, 0.90] |
| <i>Bramble</i>         |              |      |              |
|                        | $L_{\infty}$ | 306  | [274, 327]   |
|                        | $k$          | 0.64 | [0.54, 0.94] |
| <i>Hedley</i>          |              |      |              |
|                        | $L_{\infty}$ | 334  | [298, 358]   |
|                        | $k$          | 0.50 | [0.41, 0.81] |
| <i>McCulloch</i>       |              |      |              |
|                        | $L_{\infty}$ | 323  | [308, 342]   |
|                        | $k$          | 0.44 | [0.39, 0.50] |
| <i>Elford</i>          |              |      |              |
|                        | $L_{\infty}$ | 358  | [340, 384]   |
|                        | $k$          | 0.52 | [0.41, 0.66] |
| <i>Arlington</i>       |              |      |              |
|                        | $L_{\infty}$ | 328  | [318, 340]   |
|                        | $k$          | 0.62 | [0.55, 0.72] |
| <i>Spitfire</i>        |              |      |              |
|                        | $L_{\infty}$ | 301  | [293, 308]   |
|                        | $k$          | 1.55 | [1.44, 1.73] |
| <i>Pickersgill</i>     |              |      |              |
|                        | $L_{\infty}$ | 326  | [310, 343]   |
|                        | $k$          | 0.42 | [0.37, 0.48] |
| <i>Endeavour</i>       |              |      |              |
|                        | $L_{\infty}$ | 347  | [326, 380]   |
|                        | $k$          | 0.36 | [0.31, 0.37] |
| <i>Emily</i>           |              |      |              |
|                        | $L_{\infty}$ | 282  | [271, 294]   |
|                        | $k$          | 0.65 | [0.57, 0.74] |
| <i>South Direction</i> |              |      |              |
|                        | $L_{\infty}$ | 362  | [346, 384]   |
|                        | $k$          | 0.48 | [0.41, 0.53] |
| <i>North Direction</i> |              |      |              |
|                        | $L_{\infty}$ | 400  | [376, 428]   |
|                        | $k$          | 0.36 | [0.32, 0.43] |
| <i>MacGillivray</i>    |              |      |              |
|                        | $L_{\infty}$ | 343  | [312, 385]   |
|                        | $k$          | 0.44 | [0.35, 0.56] |
| <i>Lizard</i>          |              |      |              |
|                        | $L_{\infty}$ | 322  | [309, 339]   |
|                        | $k$          | 0.66 | [0.56, 0.82] |
